# Supplementary material for: Doxycycline down-regulates DNA-PK and radiosensitizes tumor initiating cells: Implications for more effective radiation therapy
Source: PubMed Central journal article supplement (PMC4546447; doi:10.18632/oncotarget.4159), 2015-06-13
Supplement: oncotarget-06-14005-s001.pdf [file oncotarget-06-14005-s001.pdf]

## SUPPLEMENTARY FIGURE

### Four Primary Cancer Samples from Metastatic Disease Sites

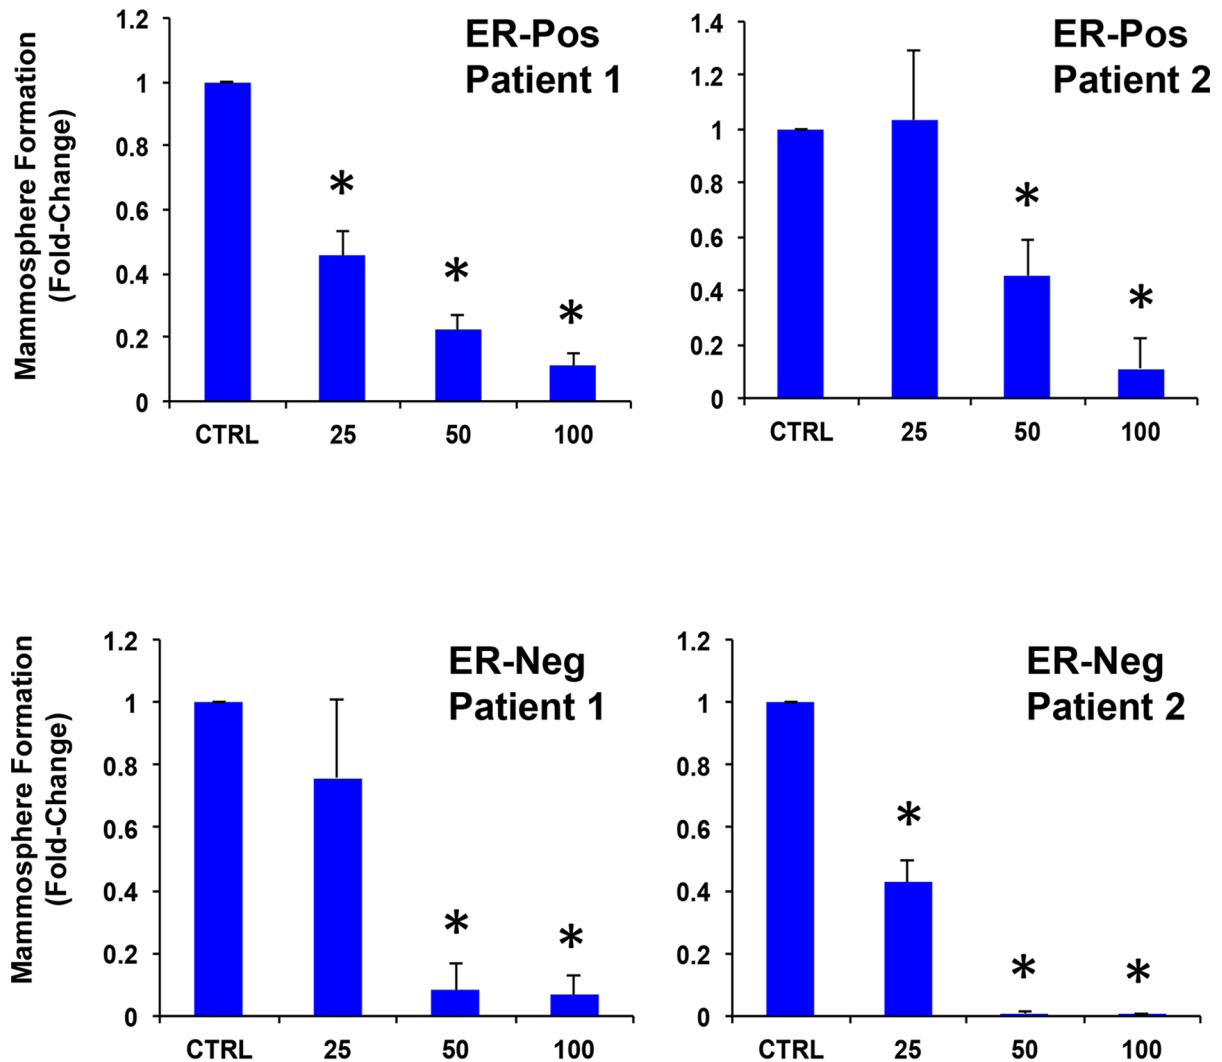

\* $p < 0.002$

**Supplementary Figure S1: Doxycycline inhibits mammosphere formation, as assessed using four primary breast cancer samples from metastatic disease sites.** Upper panels: ER-positive ( $N = 2$  patients); Lower panels: ER-negative ( $N = 2$  patients). Note that doxycycline dose-dependently (0, 25, 50 and 100  $\mu\text{M}$ ) inhibits mammosphere formation in four different primary patient samples derived from metastatic disease sites (either pleural effusions or ascites). Doxycycline works well in metastatic samples derived from both ER-positive or ER-negative patients. All experiments were performed in triplicate.
